# Supplementary material
Source: PubMed Central journal article supplement (PMC3443810)

**Data Supplement to:**

**Genome-Wide Transcriptional Profiling Reveals Connective Tissue Mast Cell Accumulation in Bronchopulmonary Dysplasia.**

<sup>1</sup>Soumyaroop Bhattacharya, <sup>1</sup>Diana Go, <sup>1</sup>Daria L Krenitsky, <sup>1</sup>Heidi L Huyck, <sup>1</sup>Siva Kumar Solleti, <sup>1</sup>Valerie A Lunger, <sup>2</sup>Leon Metlay, <sup>3</sup>Sorachai Srisuma, <sup>4</sup>Susan E Wert, <sup>1</sup>Thomas J Mariani\* and <sup>1</sup>Gloria S Pryhuber\*

Departments of <sup>1</sup>Pediatrics and <sup>2</sup>Pathology, University of Rochester Medical Center, 601 Elmwood Ave, Box 850, Rochester, NY 14642, USA, <sup>3</sup>Department of Physiology, Faculty of Medicine Siriraj Hospital, Mahidol University, Bangkok, Thailand and Perinatal Institute, <sup>4</sup>Cincinnati Children's Hospital Medical Center, Cincinnati, OH 45229.

\*Corresponding Authors

7 Figures

2 Tables

3 Supplemental Figures

4 Supplemental Tables

Address for Correspondence:

Gloria S Pryhuber, MD  
Division of Neonatology,  
Department of Pediatrics,  
University of Rochester Medical Center,  
601 Elmwood Ave, Box 850,  
Rochester, NY 14642,  
USA

Thomas J Mariani, PhD  
Division of Neonatology and  
Center for Pediatric Biomedical Research  
University of Rochester Medical Center,  
601 Elmwood Ave, Box 850,  
Rochester, NY 14642,  
USA

Running Title: Genome-Wide Expression in BPD

Keywords: microarray, tryptase, chymase, carboxypeptidase A3, BPD

Funding support: University of Rochester Clinical and Translational Science Institute (NIH UL1 RR024160-03), University of Rochester Strong Children's Research Center, NIH T32HD057821

**Supplemental Table 1:** Primer sequences and assay information for qPCR validation performed in this study. Shown are gene ID, forward and reverse primer sequences, or assay ID for commercial assays.

| <b>Gene</b>         | <b>Forward Primer</b>   | <b>Reverse Primer</b>   |
|---------------------|-------------------------|-------------------------|
| <i>SYBR Assay</i>   |                         |                         |
| <i>Human</i>        |                         |                         |
| PPIA                | CCCACCGTGTCTTCGACATT    | GGACCCGTATGCTTTAGGATGA  |
| IGF1                | ATGCTCTTCAGTTCGTGTGTG   | GGGCTGATACTTCTGGGTCTT   |
| CCL17               | CTTCTCTGCAGCACATCCAC    | CTGCCCTGCACAGTTACAAA    |
| CEACAM5             | CCCAGACTCGTCTTACCTTGC   | TTGGCGATAAAGAGAACTTGTT  |
| CEACAM6             | TCCCCCTCAAAGGCCAATTAC   | TGGAACGTCCCATTGATAAACC  |
| SLC27A6             | ACTCCGTATGCCATTTCCAA    | TTGGAGAAGTTTGTGCTACTC   |
| FABP4               | AGCACCATAACCTTAGATGGGG  | CGTGGAAGTGACGCCTTCA     |
| SFN                 | AGGCCGAACGCTATGAGGA     | GGTTTCGCTCTTCGAGGA      |
| COL8A1              | GCTGCCACCTCAAATTCCTC    | CAGGGGCTGGTATTGTGGA     |
| HHIP                | CTTTGGCCCTGACGGCTTT     | GTAGCACTGAGCCTGTGAAATC  |
| TEK                 | TGCCACCCTGGTTTTTACGG    | TTGGAAGCGATCACACATCTC   |
| CPA3                | GGGTTTGATTGCTACCACTCTT  | GCCAAGTCCTTTATGATGTCTGC |
| TPSB2               | CCGCGACCGATACTGGATG     | GATCTGGGCGGTGTAGAACT    |
| TPSAB1              | GTGACGCAAATAACCACTTGGC  | CCATTCACCTTGACACCAGGG   |
| KITLG               | AATCCTCTCGTCAAACCTGAAGG | CCATCTCGCTTATCCAACAATGA |
| IL4                 | CGGCAACTTTGTCCACGGA     | TCTGTTACGGTCAACTCGGTG   |
| GRP                 | AAAGAGCACAGGGGAGTCTTC   | TCCTTTGCTTCTATGAGACCCA  |
| <i>Mouse</i>        |                         |                         |
| CPA3                | AATTGCTCCTGTCCACTTTGAC  | TCACTAACTCGGAAATCCACAGT |
| TPSB2               | CTGGCTAGTCTGGTGTACTCG   | ATGCCCACTCGCTGATTGG     |
| TPSAB1              | GCCAATGACACCTACTGGATG   | GAGCTGTACTCTGACCTTGTTG  |
| <i>Taqman Assay</i> |                         |                         |
|                     | <i>ABI Assay ID</i>     |                         |
| PPIA                | Hs04194521_s1           |                         |
| CXCL5               | Hs00171085_m1           |                         |

**Supplemental Table 2:** Gene expression data for a subset of "vascular-related" genes in BPD tissue as compared to controls. Shown are gene symbol, probe set ID, fold-change (BPD/control) and p-value as defined by student's t-test, for representative measures. Although magnitude changes are small, likely diluted by non-vascular cells, we observed a general decrease in expression of vascular markers.

| <i>Genes</i> | <i>Probe sets</i> | <i>P Value</i> | <i>Fold Change</i> |
|--------------|-------------------|----------------|--------------------|
| HIF3A        | 222123_s_at       | <b>0.05</b>    | 0.50               |
| FLT1         | 204406_at         | 0.09           | 0.77               |
| NOS1         | 1560974_s_at      | 0.21           | 0.79               |
| NOS2         | 210037_s_at       | <b>0.02</b>    | 0.82               |
| TIE2         | 206702_at         | <b>0.02</b>    | 0.82               |
| NOS3         | 205581_s_at       | 0.41           | 0.88               |
| PECAM1       | 208983_s_at       | 0.31           | 0.91               |
| ENG          | 201808_s_at       | 0.68           | 0.94               |
| VEGF         | 212171_x_at       | 0.67           | 0.94               |
| ANG1         | 205608_s_at       | 0.59           | 1.08               |
| HIF1A        | 200989_at         | 0.06           | 1.13               |

**Supplemental Table 3:** Genes significantly affected in BPD lung tissue. Shown are gene symbol, probe set ID, fold-change (BPD/control) and p-value as defined by student's t-test, for 159 genes.

| <i>Genes</i> | <i>Probe set</i> | <i>P Value</i> | <i>Fold Change</i> |
|--------------|------------------|----------------|--------------------|
| CPA3         | 205624_at        | 2.27E-03       | 7.25               |
| CCL18        | 32128_at         | 1.95E-03       | 6.73               |
| IGHA1        | 217022_s_at      | 1.94E-02       | 6.69               |
| TPSB2        | 207134_x_at      | 5.65E-03       | 5.25               |
| TPSAB1       | 205683_x_at      | 4.88E-03       | 5.15               |
| ALDH1A3      | 203180_at        | 2.25E-03       | 4.54               |
| IGHM         | 211430_s_at      | 8.02E-02       | 4.37               |
| PLUNC        | 220542_s_at      | 3.47E-02       | 4.17               |
| FABP4        | 203980_at        | 8.77E-03       | 4.16               |
| DNAJC5B      | 232798_at        | 8.24E-03       | 4.03               |
| ATP6V0D2     | 1553155_x_at     | 8.54E-03       | 3.72               |
| CXCL13       | 205242_at        | 3.60E-02       | 3.64               |
| EREG         | 205767_at        | 9.83E-03       | 3.28               |
| CEACAM5      | 201884_at        | 1.66E-02       | 3.17               |
| COMP         | 205713_s_at      | 9.43E-03       | 3.02               |
| C20ORF114    | 226067_at        | 9.41E-02       | 2.98               |
| IGJ          | 212592_at        | 1.81E-02       | 2.95               |
| CH25H        | 206932_at        | 1.84E-02       | 2.84               |
| LGALS3       | 1557197_a_at     | 9.13E-03       | 2.83               |
| SFN          | 33323_r_at       | 2.96E-02       | 2.79               |
| IGL@         | 215214_at        | 6.29E-02       | 2.78               |
| COL8A1       | 214587_at        | 1.97E-04       | 2.72               |
| RBP4         | 222049_s_at      | 5.51E-02       | 2.72               |
| TDO2         | 231702_at        | 2.15E-02       | 2.67               |
| HDC          | 207067_s_at      | 8.44E-03       | 2.58               |
| MSMB         | 207430_s_at      | 1.39E-01       | 2.56               |
| INHBA        | 210511_s_at      | 2.22E-02       | 2.55               |
| ASPM         | 219918_s_at      | 4.88E-03       | 2.50               |
| STEAP1       | 205542_at        | 9.45E-03       | 2.49               |
| NNMT         | 202238_s_at      | 4.02E-03       | 2.47               |
| PCOLCE2      | 219295_s_at      | 8.37E-02       | 2.46               |
| IGKC         | 215217_at        | 1.75E-01       | 2.45               |
| PBK          | 219148_at        | 2.11E-02       | 2.44               |
| PAPPA        | 224942_at        | 4.72E-02       | 2.42               |
| CEACAM6      | 211657_at        | 5.82E-04       | 2.40               |
| CD8A         | 205758_at        | 1.16E-01       | 2.39               |
| NEIL3        | 219502_at        | 3.92E-03       | 2.38               |
| APOC2        | 231562_at        | 3.09E-02       | 2.35               |
| SIGLEC6      | 206519_x_at      | 1.99E-02       | 2.34               |
| RRM2         | 209773_s_at      | 5.62E-03       | 2.34               |

|          |              |          |      |
|----------|--------------|----------|------|
| APOBEC3B | 206632_s_at  | 1.06E-02 | 2.32 |
| C6ORF105 | 229070_at    | 3.13E-02 | 2.32 |
| PSCA     | 1560011_at   | 1.10E-03 | 2.31 |
| ADAMTS16 | 238125_at    | 2.20E-02 | 2.30 |
| GREM1    | 218469_at    | 8.91E-02 | 2.29 |
| IL1RL1   | 242809_at    | 2.05E-01 | 2.29 |
| DOK5     | 214844_s_at  | 2.82E-03 | 2.29 |
| CXCL5    | 215101_s_at  | 6.16E-02 | 2.29 |
| DKK1     | 204602_at    | 4.06E-02 | 2.28 |
| CDK1     | 231534_at    | 2.91E-03 | 2.28 |
| CGA      | 204637_at    | 6.86E-02 | 2.28 |
| DEPDC1   | 222958_s_at  | 9.66E-03 | 2.26 |
| SELE     | 206211_at    | 1.58E-01 | 2.26 |
| GPR109B  | 205220_at    | 3.74E-02 | 2.25 |
| CHIT1    | 208168_s_at  | 5.80E-03 | 2.23 |
| P4HA3    | 228703_at    | 1.33E-02 | 2.22 |
| DIO2     | 203700_s_at  | 2.69E-03 | 2.21 |
| IGK@     | 221651_x_at  | 1.47E-01 | 2.21 |
| SERPINA1 | 230318_at    | 5.78E-02 | 2.20 |
| ACP5     | 204638_at    | 7.05E-02 | 2.20 |
| PLA2G2A  | 203649_s_at  | 1.07E-01 | 2.20 |
| BHLHE22  | 228636_at    | 1.61E-01 | 2.20 |
| TTK      | 204822_at    | 8.40E-03 | 2.19 |
| C7ORF68  | 1554452_a_at | 2.15E-02 | 2.19 |
| SLC18A2  | 205857_at    | 1.38E-02 | 2.18 |
| TMTC1    | 224397_s_at  | 2.21E-02 | 2.18 |
| KIF14    | 236641_at    | 3.11E-03 | 2.18 |
| KIF18B   | 222039_at    | 1.93E-02 | 2.18 |
| CA12     | 203963_at    | 1.66E-02 | 2.18 |
| SFRP2    | 223122_s_at  | 1.42E-01 | 2.17 |
| KRT17    | 205157_s_at  | 1.49E-01 | 2.16 |
| ADORA3   | 223660_at    | 7.77E-02 | 2.15 |
| TARP     | 211144_x_at  | 5.10E-02 | 2.15 |
| SKA1     | 217640_x_at  | 8.40E-03 | 2.15 |
| CD5L     | 206680_at    | 3.23E-02 | 2.14 |
| MXRA5    | 209596_at    | 8.70E-02 | 2.14 |
| DLGAP5   | 203764_at    | 1.16E-02 | 2.14 |
| CDCP1    | 218451_at    | 2.31E-02 | 2.14 |
| BUB1     | 209642_at    | 2.74E-03 | 2.14 |
| ANLN     | 1552619_a_at | 1.05E-02 | 2.14 |
| C1QB     | 202953_at    | 3.46E-02 | 2.14 |
| KIAA0101 | 202503_s_at  | 7.27E-03 | 2.13 |
| KMO      | 205306_x_at  | 3.22E-02 | 2.13 |
| LIPG     | 219181_at    | 1.48E-01 | 2.12 |
| CDC25C   | 205167_s_at  | 1.18E-02 | 2.12 |
| MS4A2    | 207496_at    | 3.05E-02 | 2.12 |

|           |              |          |      |
|-----------|--------------|----------|------|
| TNIP3     | 220655_at    | 1.38E-02 | 2.11 |
| C1QA      | 218232_at    | 2.81E-02 | 2.10 |
| IL17RB    | 224156_x_at  | 1.20E-02 | 2.10 |
| THEMIS    | 1558972_s_at | 1.29E-01 | 2.10 |
| CD177     | 219669_at    | 1.94E-01 | 2.10 |
| CENPA     | 204962_s_at  | 1.40E-02 | 2.09 |
| MKI67     | 212023_s_at  | 1.23E-02 | 2.09 |
| KIF23     | 244427_at    | 2.23E-03 | 2.09 |
| HS3ST2    | 219697_at    | 2.48E-02 | 2.09 |
| MND1      | 223700_at    | 5.08E-03 | 2.08 |
| C10ORF10  | 209182_s_at  | 5.14E-02 | 2.08 |
| POSTN     | 1555778_a_at | 3.37E-02 | 2.08 |
| HLA-DRB4  | 209728_at    | 4.81E-01 | 2.08 |
| ADCYAP1   | 230237_at    | 1.18E-01 | 2.08 |
| CCDC102B  | 220301_at    | 1.22E-02 | 2.06 |
| ARNTL2    | 220658_s_at  | 2.86E-02 | 2.06 |
| SIGLEC1   | 219519_s_at  | 4.98E-02 | 2.05 |
| BIRC5     | 202094_at    | 1.76E-02 | 2.05 |
| IQGAP3    | 229538_s_at  | 4.34E-02 | 2.05 |
| TPX2      | 210052_s_at  | 6.15E-03 | 2.05 |
| IGF1      | 209542_x_at  | 8.90E-03 | 2.03 |
| SPC25     | 209891_at    | 3.00E-02 | 2.03 |
| CDKN3     | 209714_s_at  | 6.98E-03 | 2.02 |
| DHRS9     | 219799_s_at  | 1.91E-02 | 2.02 |
| CYP24A1   | 206504_at    | 3.11E-02 | 2.02 |
| TOP2A     | 201291_s_at  | 1.82E-02 | 2.02 |
| LIF       | 205266_at    | 1.16E-01 | 2.02 |
| SH3RF2    | 228892_at    | 7.57E-03 | 2.02 |
| TMEM158   | 213338_at    | 2.15E-02 | 2.02 |
| DIAPH3    | 220997_s_at  | 7.49E-03 | 2.01 |
| NEK2      | 204641_at    | 8.27E-03 | 2.01 |
| MARCO     | 205819_at    | 1.17E-01 | 2.00 |
| POU2AF1   | 1569675_at   | 9.41E-02 | 0.50 |
| ADCYAP1R1 | 226690_at    | 6.13E-02 | 0.50 |
| CA4       | 206209_s_at  | 6.51E-04 | 0.50 |
| LRRC15    | 213909_at    | 1.37E-01 | 0.49 |
| RORC      | 228806_at    | 6.18E-03 | 0.49 |
| AGER      | 210081_at    | 1.28E-02 | 0.48 |
| COL4A6    | 213992_at    | 7.68E-03 | 0.48 |
| UGT2B17   | 207245_at    | 9.48E-02 | 0.48 |
| RTKN2     | 230469_at    | 9.16E-02 | 0.47 |
| XIST      | 221728_x_at  | 5.58E-01 | 0.47 |
| SOX11     | 204913_s_at  | 5.48E-02 | 0.47 |
| KCNJ16    | 219564_at    | 4.91E-02 | 0.47 |
| HHIP      | 1556037_s_at | 3.44E-02 | 0.47 |
| ALPP      | 204664_at    | 1.03E-02 | 0.47 |

|         |              |          |      |
|---------|--------------|----------|------|
| FABP6   | 210445_at    | 9.35E-03 | 0.47 |
| KANK4   | 229125_at    | 3.42E-04 | 0.46 |
| SLC27A6 | 219932_at    | 1.02E-03 | 0.46 |
| PRND    | 222106_at    | 2.65E-01 | 0.45 |
| FCER1A  | 211734_s_at  | 1.78E-02 | 0.43 |
| TLL6    | 230924_at    | 3.36E-04 | 0.43 |
| GHRL    | 223862_at    | 1.26E-01 | 0.42 |
| CSMD1   | 231223_at    | 1.22E-02 | 0.41 |
| CCL22   | 207861_at    | 2.28E-02 | 0.41 |
| AADAC   | 205969_at    | 4.54E-02 | 0.41 |
| CCL17   | 207900_at    | 4.50E-04 | 0.41 |
| APOH    | 205216_s_at  | 2.54E-02 | 0.40 |
| GPIHBP1 | 238062_at    | 7.14E-02 | 0.39 |
| LRRC2   | 219949_at    | 2.16E-02 | 0.39 |
| GSTT1   | 232193_at    | 1.06E-02 | 0.39 |
| LPPR1   | 219732_at    | 3.34E-02 | 0.39 |
| SLC44A5 | 235763_at    | 9.88E-03 | 0.39 |
| SOSTDC1 | 213456_at    | 1.39E-02 | 0.38 |
| S100A3  | 206027_at    | 6.59E-03 | 0.37 |
| UPK3B   | 206658_at    | 9.10E-03 | 0.36 |
| SLCO1A2 | 211480_s_at  | 3.67E-02 | 0.33 |
| OLFM3   | 1554524_a_at | 1.43E-02 | 0.32 |
| ANXA8L2 | 203074_at    | 1.51E-02 | 0.31 |
| VGLL1   | 215729_s_at  | 6.71E-03 | 0.31 |
| EDN3    | 208399_s_at  | 4.52E-02 | 0.28 |
| ITLN1   | 223597_at    | 4.14E-02 | 0.28 |
| PSPH    | 205048_s_at  | 8.37E-02 | 0.26 |

---

**Supplemental Table 4:** qPCR validation of IL4, GRP and KITLG expression in human lung tissue. Shown are mean fold-change ( $\pm$  standard deviation) in each group, non-BPD control (CTL) or BPD, relative to the control population. IL4 expression was not detectable in lung tissue from either group. GRP and KITLG expression were detectable in all lung tissues, but no differences in BPD subjects were observed.

|              | <i>Control</i>     | <i>BPD</i>         |         |
|--------------|--------------------|--------------------|---------|
| <b>IL4</b>   | ND                 | ND                 | ND      |
| <b>GRP</b>   | 1.26 ( $\pm$ 0.96) | 1.70 ( $\pm$ 1.28) | p>>0.05 |
| <b>KITLG</b> | 1.21 ( $\pm$ 0.67) | 1.06 ( $\pm$ 0.55) | p>>0.05 |

ND = Not Detectable



**Supplemental Figure 1.** We used immunohistochemistry to identify tryptase, a general mast cell-specific marker. Quantitative analysis of the number of tryptase-expressing cells in BPD and non-BPD control lungs is indicated at the top left. Shown are the average numbers of stained cells/field for each individual subject (dots), the group means (bar) and interquartile range (box). Individual images show staining patterns in corrected gestational age matched control and BPD subjects (subject ID indicated). Panels are arranged according to gestational age at death. Also shown is an absence of staining in non-immune serum controls. Bar graphs at bottom show distribution of stained cells within the alveolar, peribronchiolar or perivascular region of BPD and control tissues. Data are presented as the average absolute number of cells per subject in each region (bottom left) or the frequency (proportion) of stained cells found in each region (bottom right).

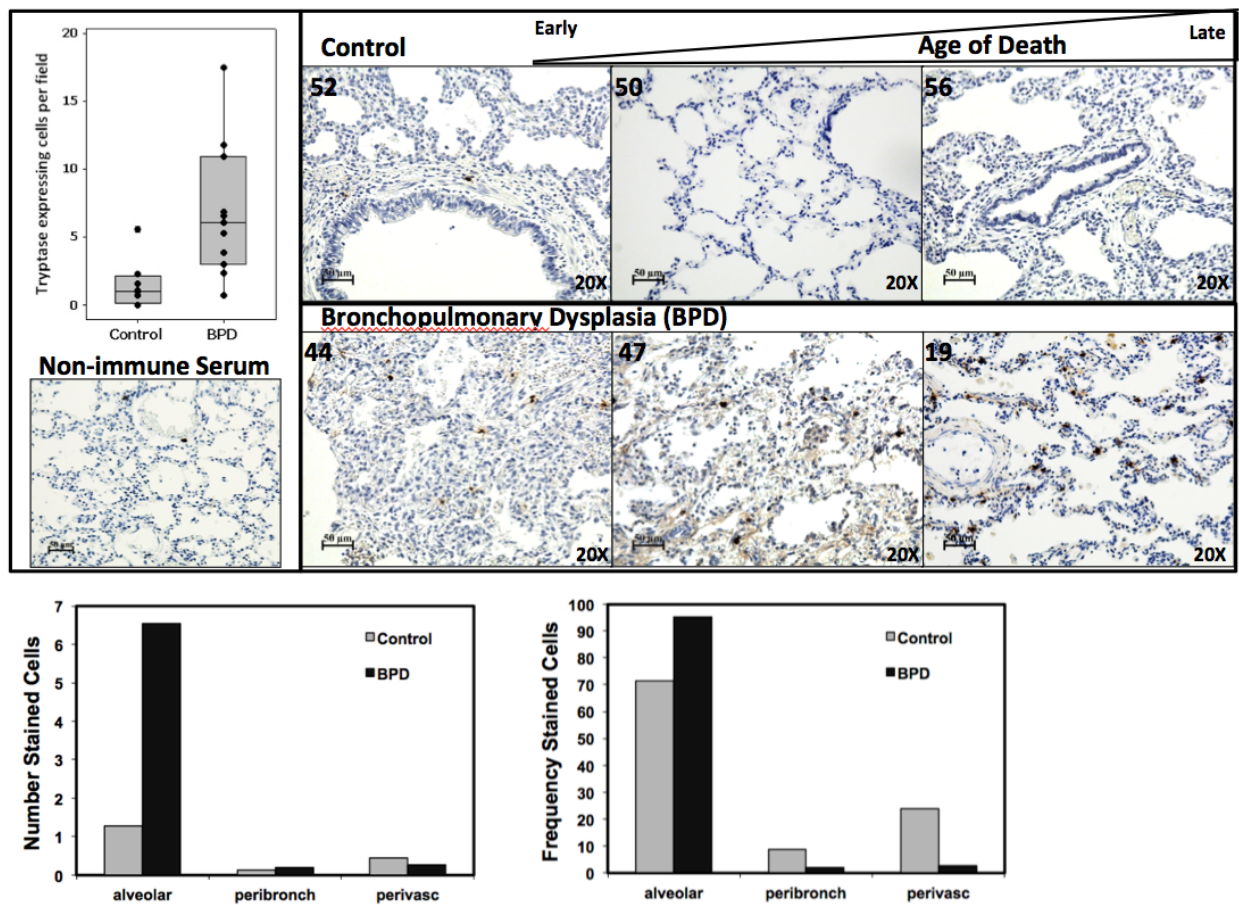

**Supplemental Figure 2.** We used immunohistochemistry to identify chymase, a specific marker for connective tissue-type mast cells. Quantitative analysis of the number of chymase-expressing cells in BPD and non-BPD control lungs is indicated at the top left. Shown are the average numbers of stained cells/field for each individual subject (dots), the group means (bar) and interquartile range (box). Individual images show staining patterns in corrected gestational age matched control and BPD subjects (subject ID indicated). Panels are arranged according to gestational age at death. Also shown is an absence of staining in non-immune serum controls. Bar graphs at bottom show distribution of stained cells within the alveolar, peribronchiolar or perivascular region of BPD and control tissues. Data are presented as the average absolute number of cells per subject in each region (bottom left) or the frequency (proportion) of stained cells found in each region (bottom right). Bar graphs at bottom show distribution of stained cells within the alveolar, peribronchiolar or perivascular region of BPD and control tissues. Data are presented as the average absolute number of cells in each region (bottom left) or the frequency of stained cells found in each region (bottom right).

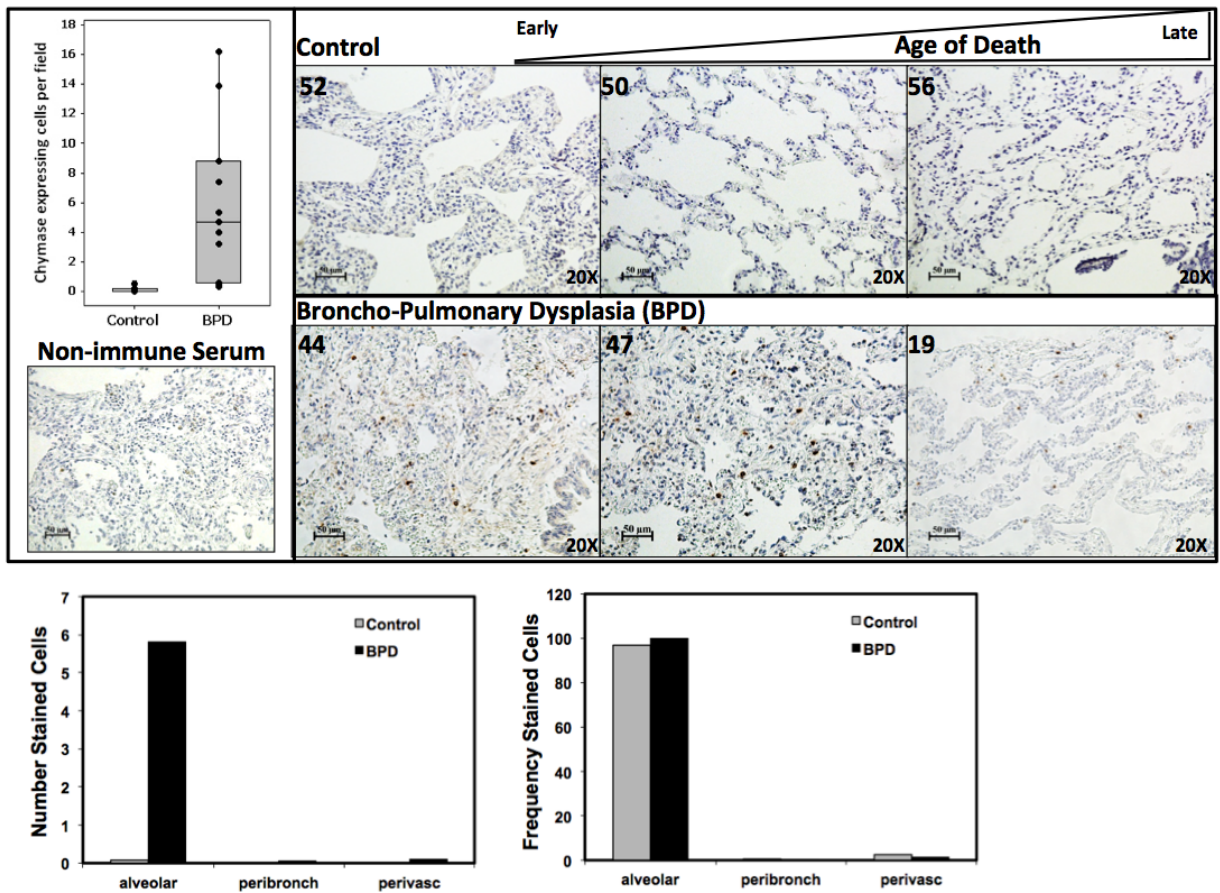

**Supplemental Figure 3.** We used immunohistochemistry to identify chymase, a specific marker for connective tissue-type mast cells, in a mouse model of BPD-like lung injury. Chymase expressing cells were observed in lung tissue from FGFR3/4 deficient mice at 1 month of age (B, D, F), but rarely in age-matched, littermate control lungs (A, C). No staining was detected in control sections stained with pre-immune serum (E). Original magnification = 200X.

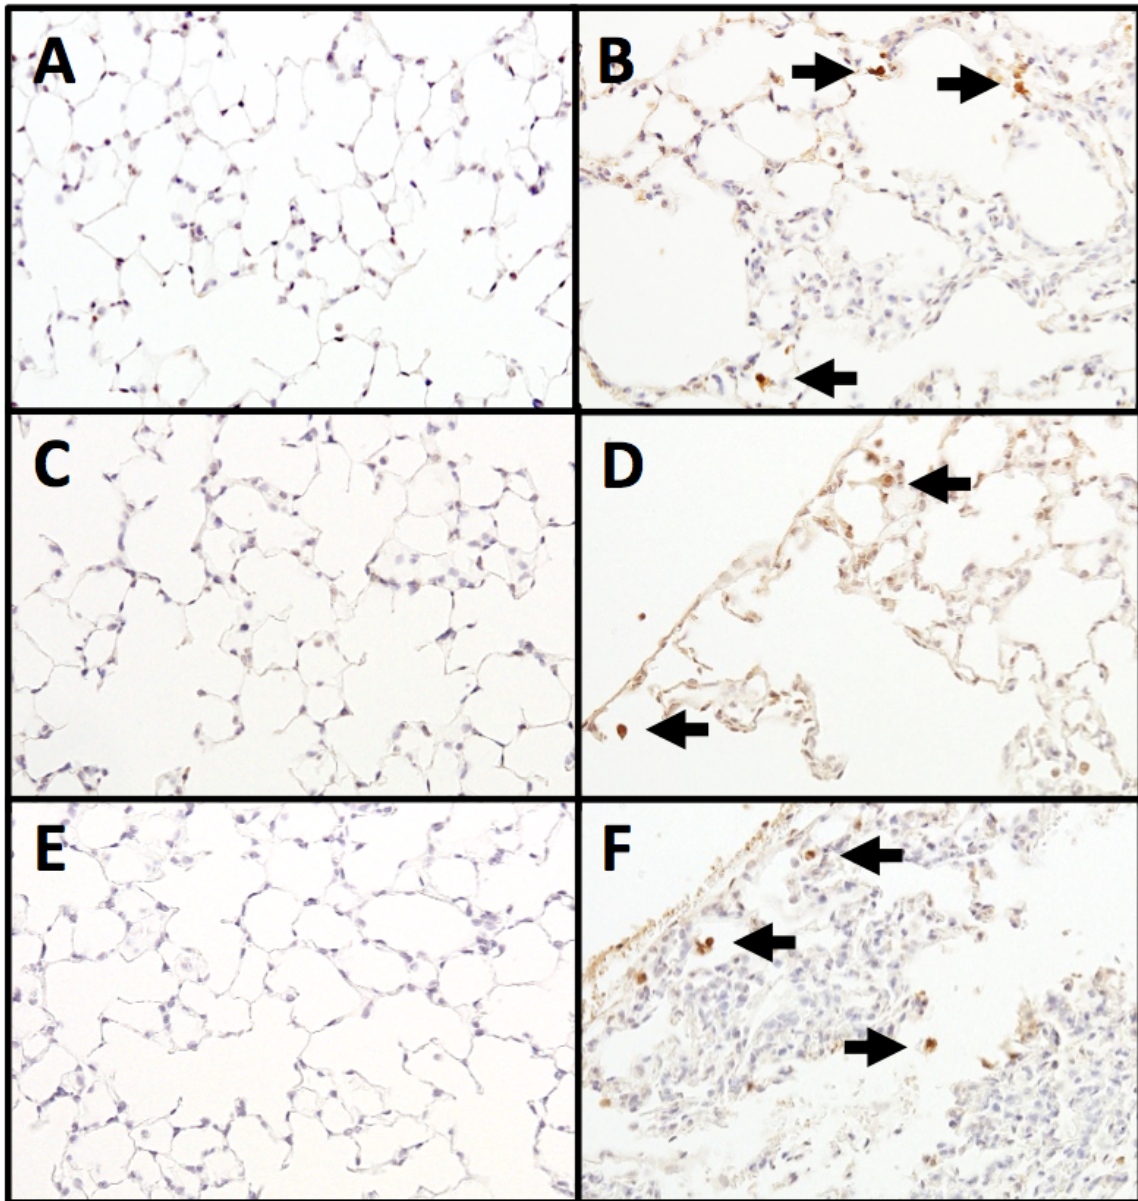

Supplement: supp_186.4.349_Bhattacharya_ODS.pdf [file supp_186.4.349_Bhattacharya_ODS.pdf]
